# Supplementary material for: Three cases of histologically proven hepatic epithelioid hemangioendothelioma evaluated using a second-generation microbubble contrast medium in ultrasonography: case reports
Source: PubMed Central journal article supplement (PMC6857163; doi:10.1186/s12876-019-1113-y), 2019-11-14
Supplement: 12876_2019_1113_MOESM1_ESM.pdf [file 12876_2019_1113_MOESM1_ESM.pdf]

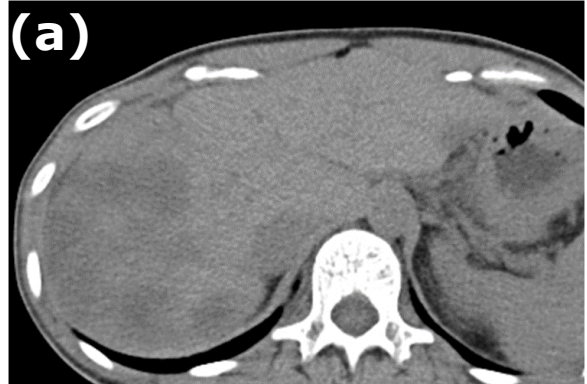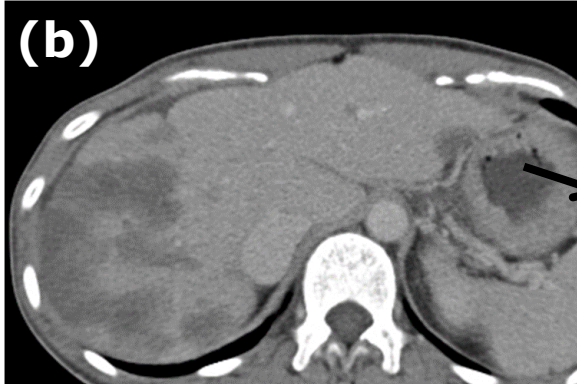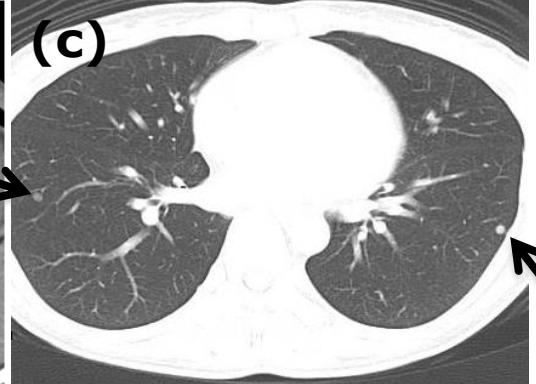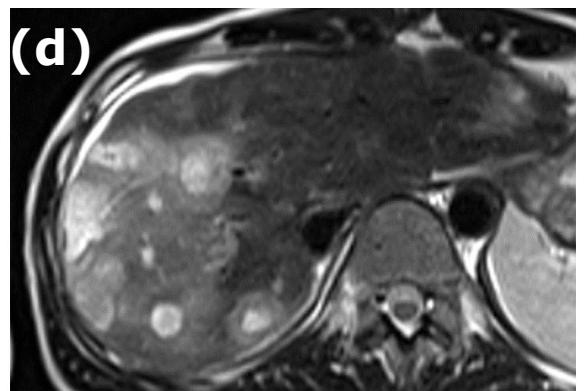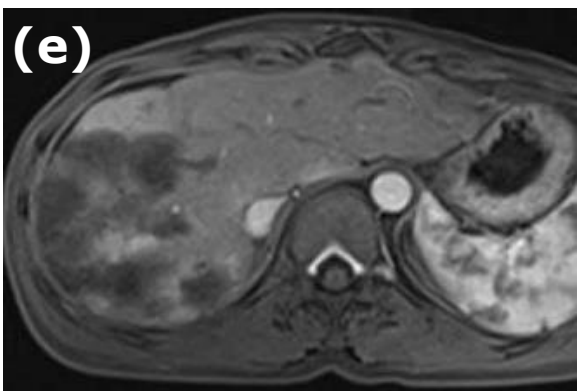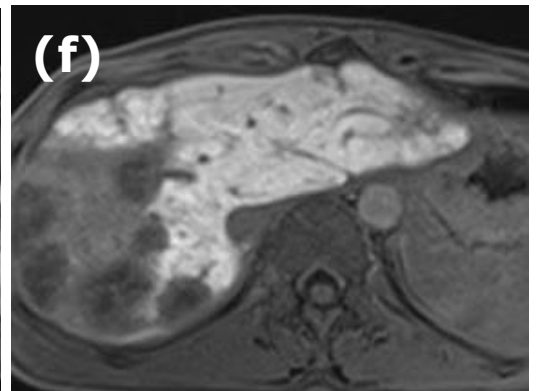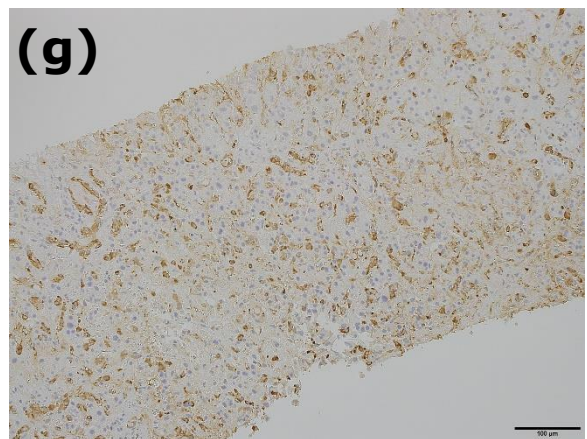

**Supple. Figure 1**

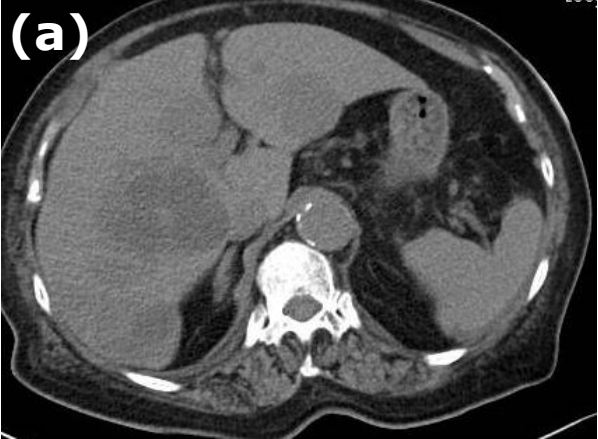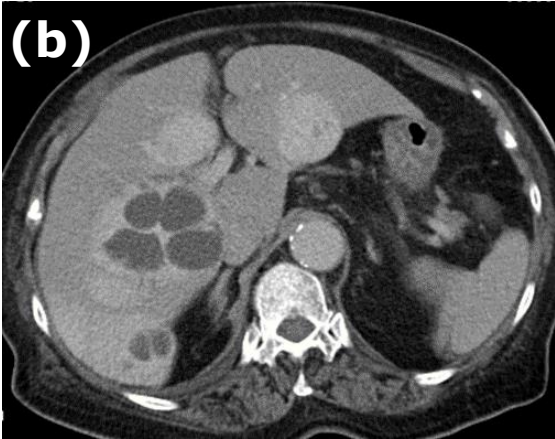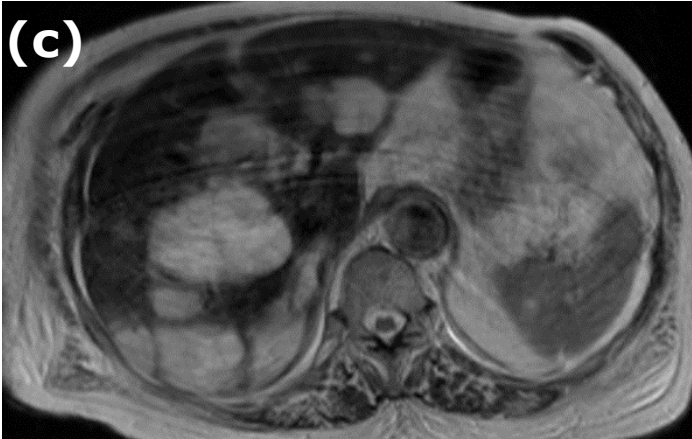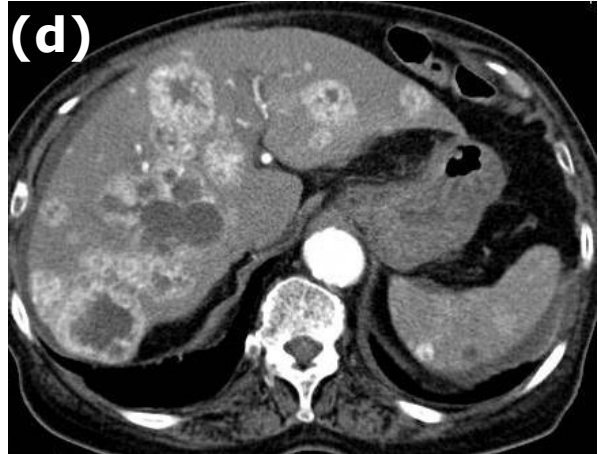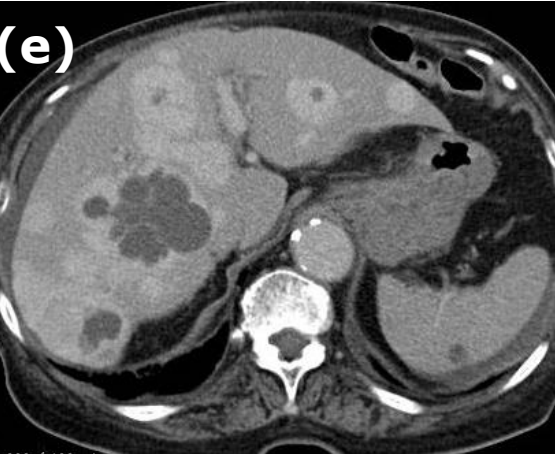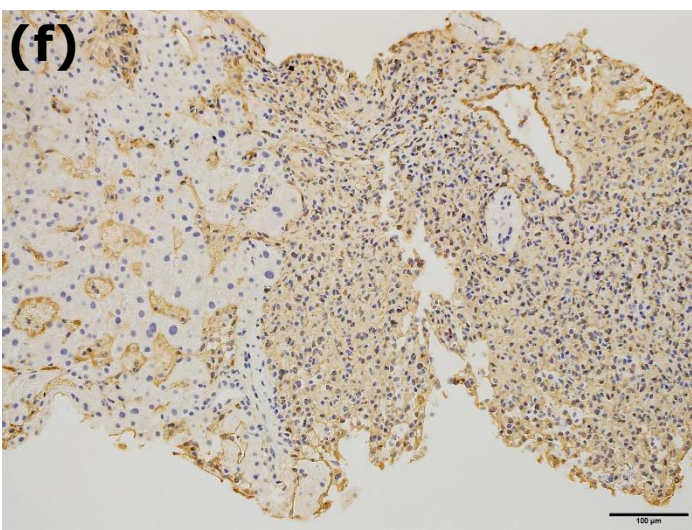

**Supple. Figure 2**

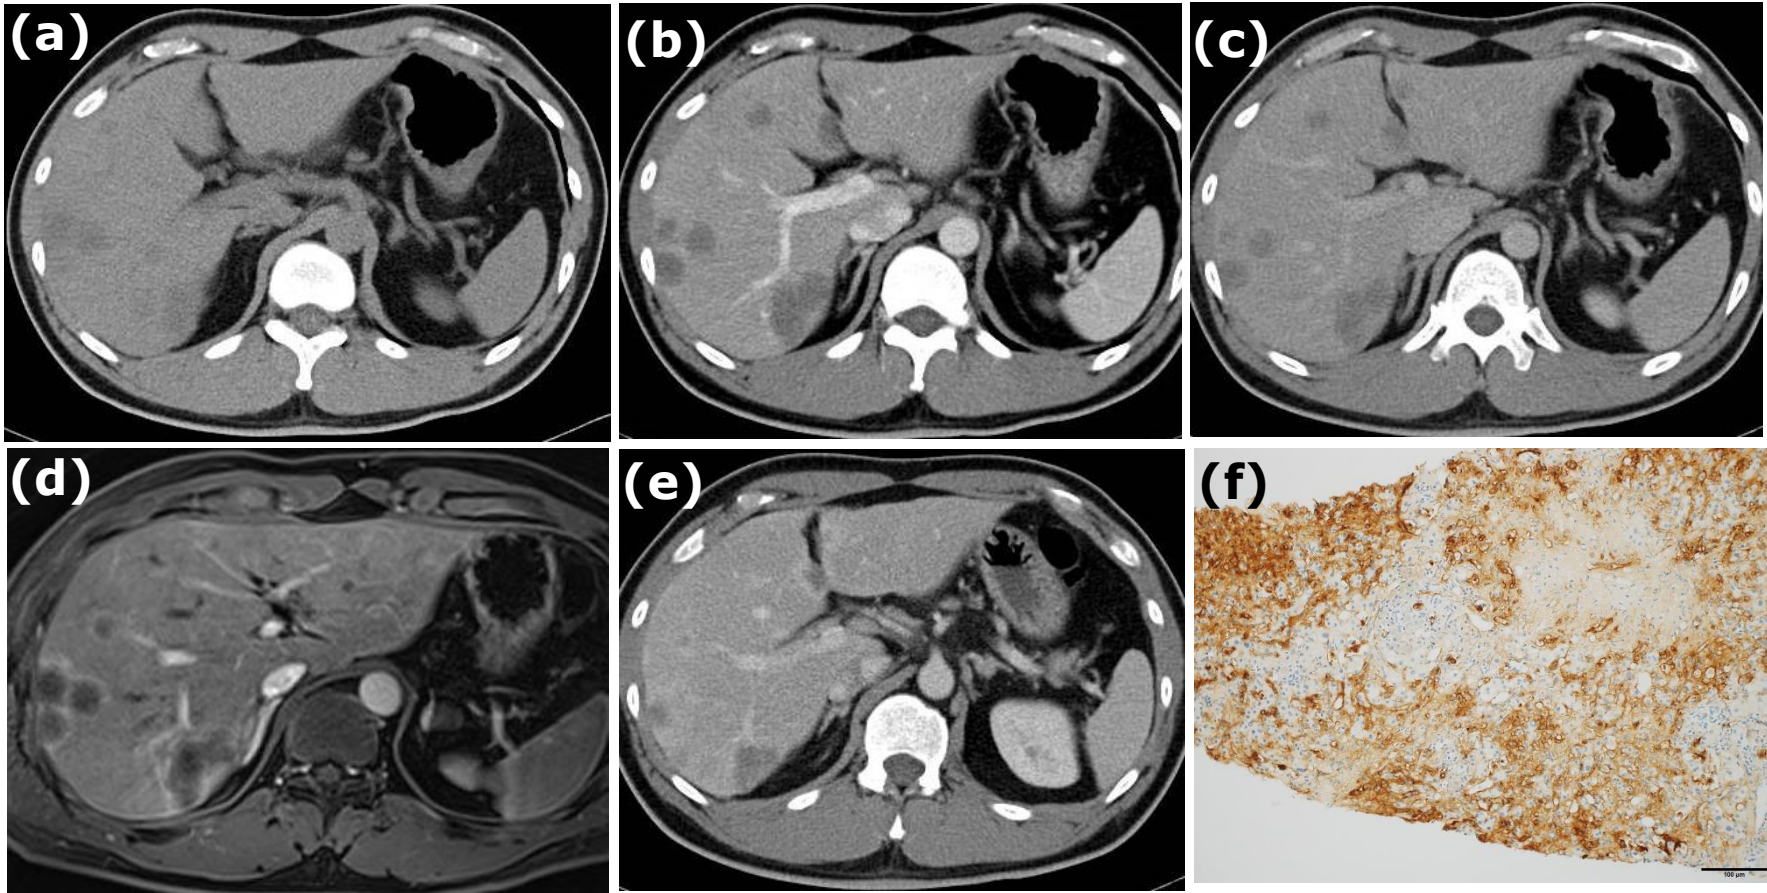

**Supple. Figure 3**
